# Supplementary material for: On Indexicality, Direction of Arrival of Sound Sources, and Human-Robot Interaction
Source: Hindawi journal article supplement (doi:10.1155/2016/3081048), 2016-01-01
Supplement: f1 [file 3081048.f1.zip]

Archive with 5 entries (4 files):
- Videos paper/
- Videos paper/following a person.mp4
- Videos paper/playing Marco-Polo.mp4
- Videos paper/taking attendance of a class.mp4
- Videos paper/waiter in a restaurant.mp4
